# Supplementary material for: Low circulating levels of the mitochondrial-peptide hormone SHLP2: novel biomarker for prostate cancer risk
Source: PubMed Central journal article supplement (PMC5706922; doi:10.18632/oncotarget.20134), 2017-08-10
Supplement: oncotarget-08-94900-s001.pdf [file oncotarget-08-94900-s001.pdf]

## Low circulating levels of the mitochondrial-peptide hormone SHLP2: novel biomarker for prostate cancer risk

### SUPPLEMENTARY MATERIALS

**Supplementary Table 1: Association between SHLP2 and overall risk of cancer and risk of cancer grade, stratified by race**

|                       | OR   | White<br>95% CI | P-value | OR   | Black<br>95% CI | P-value |
|-----------------------|------|-----------------|---------|------|-----------------|---------|
| <b>Multivariable*</b> |      |                 |         |      |                 |         |
| <b>No PC</b>          | Ref. |                 |         | Ref. |                 |         |
| <b>Overall PC</b>     | 0.82 | 0.65–1.03       | 0.090   | 1.00 | 0.99–1.01       | 0.592   |
|                       |      |                 |         |      |                 |         |
| <b>No PC</b>          | Ref. |                 |         | Ref. |                 |         |
| <b>Low-grade PC</b>   | 0.80 | 0.64–1.00       | 0.053   | 1.00 | 0.98–1.01       | 0.458   |
| <b>High-grade PC</b>  | 0.80 | 0.64–0.996      | 0.046   | 1.00 | 0.99–1.02       | 0.606   |

\*adjusted for age, BMI, PSA, DRE, year of consent, prostate volume, and family history of prostate cancer.
